# Supplementary material for: The Data-Driven Pattern for Healthy Behaviors of Car Drivers Based on Daily Records of Traffic Count Data From 2018 To 2019 Near Airports. A Functional Data Analysis
Source: Preprints.org preprint supplement (doi:10.20944/preprints202011.0622.v1), 2020-11-24
Supplement: Supplementary file 1 [file supplementary]

*The Supplementary for “The data-driven pattern for healthy behaviors of car drivers based on daily records of Traffic Count data from 2018 to 2019 near airports. The Functional Data Analysis”*

Mohammad Fayaz<sup>1</sup>, Alireza Abadi<sup>2,3\*</sup>, Soheila Khodakarim, Mohammadreza Hoseini<sup>5</sup>, Alireza Razzaghi<sup>6</sup>

<sup>1</sup> PhD Student of Biostatistics, Department of Biostatistics, School of Allied Medical Sciences, Shahid Beheshti University of Medical Sciences, Tehran, Iran.

<sup>2</sup> Professor of Biostatistics, Department of Community Medicine, Faculty of medicine, Shahid Beheshti University of Medical Sciences, Tehran, Iran.

<sup>3</sup> Social Determinants of Health Research Center, Shahid Beheshti University of Medical Sciences, Tehran, Iran.

<sup>4</sup> Associate Professor, School of Allied Medical Sciences, School of Public Health and Safety, Shahid Beheshti University of Medical Sciences, Tehran, Iran

<sup>5</sup> Master Student of Transportation, Tehran North Branch, Islamic Azad University, Tehran, Iran

<sup>6</sup> Road Traffic Injury Research Center, Tabriz University of Medical Sciences, Tabriz, Iran

\* Corresponding Author: Dr. Alireza Abadi ([alirezaabadi@gmail.com](mailto:alirezaabadi@gmail.com))

## Contents

|    |                                                        |    |
|----|--------------------------------------------------------|----|
| ٢٥ |                                                        |    |
| ٢٦ | 1 The logit of Driving Offences Probability .....      | 3  |
| ٢٧ | 1.1 The Bayesian Function-on-Scalar Regression .....   | 3  |
| ٢٨ | 1.1.1 Statistical Formula.....                         | 3  |
| ٢٩ | 1.1.2 The estimated regression coefficient plot .....  | 4  |
| ٣٠ | 1.1.3 The estimated regression coefficient table ..... | 5  |
| ٣١ | 2 The Behavioral Factor .....                          | 6  |
| ٣٢ | 2.1 The average speed in airports.....                 | 6  |
| ٣٣ | 2.1.1 - The B-Spline with Smoothing Parameter .....    | 6  |
| ٣٤ | 2.2 The Bayesian Function on Regression.....           | 7  |
| ٣٥ | 2.2.1 The estimated regression coefficient plot .....  | 7  |
| ٣٦ | 3 Type of Driving Offences.....                        | 8  |
| ٣٧ | 3.1 Speeding.....                                      | 8  |
| ٣٨ | 3.1.1 The Descriptive Statistics .....                 | 8  |
| ٣٩ | 3.1.2 The estimated effects .....                      | 10 |
| ٤٠ | 3.2 Unsafe Distance .....                              | 13 |
| ٤١ | 3.2.1 The Descriptive Statistics .....                 | 13 |
| ٤٢ | 3.2.2 The estimated effects .....                      | 15 |
| ٤٣ | 4 Comparisons between other countries airports.....    | 18 |
| ٤٤ | 4.1 The plot .....                                     | 18 |
| ٤٥ | 4.2 The Data resources .....                           | 19 |
| ٤٦ | 4.2.1 USA.....                                         | 19 |
| ٤٧ | 4.2.2 UK.....                                          | 20 |
| ٤٨ | 4.2.3 Ireland .....                                    | 21 |
| ٤٩ |                                                        |    |
| ٥٠ |                                                        |    |
| ٥١ |                                                        |    |
| ٥٢ |                                                        |    |
| ٥٣ |                                                        |    |
| ٥٤ |                                                        |    |

# 1 The logit of Driving Offences Probability

## 1.1 The Bayesian Function-on-Scalar Regression

### 1.1.1 Statistical Formula

We use fully Bayesian Function-on-scalar regression for high dimensional data to assess the following relationships:

$$Y_i(t) = \log\left(\frac{P(t)_{offences\ occurs}}{1 - P(t)_{offences\ occurs}}\right)_i = \sum_{k=1}^K f_k(t)\beta_{k,i} + \epsilon_i(t)$$

$$\epsilon_i(t) \sim N(0, \sigma_\epsilon^2), \quad t \in [0, 23]$$

$$\begin{aligned} \beta_{k,i} = & \mu_k + Station_i \times \alpha_{1,k} + Direction_i \times \alpha_{2,k} + Weekend_i \times \alpha_{3,k} + \\ & (Station_i \times Direction_i) \times \alpha_{4,k} + (Station_i \times Weekend_i) \times \alpha_{5,k} \\ & + (Direction_i \times Weekden_i) \times \alpha_{6,k} + (Station_i \times Direction_i \times Weekden_i) \times \alpha_{7,k} \\ & + \gamma_{k,i} \end{aligned}$$

$$\mu_k \sim N(0, \sigma_{\mu_k}^2),$$

$$\alpha_{j,k} \sim N(0, \sigma_{\alpha_{j,k}}^2),$$

$$\gamma_{k,i} \sim N(0, \sigma_{\gamma_{k,i}}^2),$$

The  $f_k(t)$  are basis functions with  $k \in [0, 23]$  number of basis for within-curve dependence of functional data, and  $\{\beta_{k,i}\}$  are coefficients for modeling the between-curve dependence. The priors for the intercepts  $\{\mu_k\}$ , the regression coefficients  $\{\alpha_{j,k}\}$  and the subject-specific errors  $\{\gamma_{k,i}\}$  are Gaussian and for observation error variance  $\sigma_\epsilon^2$  is Jeffrey. The shrinkage priors for the regression coefficients and the MCMC sampling algorithm is used to estimate the regression coefficients. The variable selection is based on the decouples shrinkage and selection (DSS). (32)

1.1.2 The estimated regression coefficient plot

The estimated regression coefficient functions are presented in the following figures:

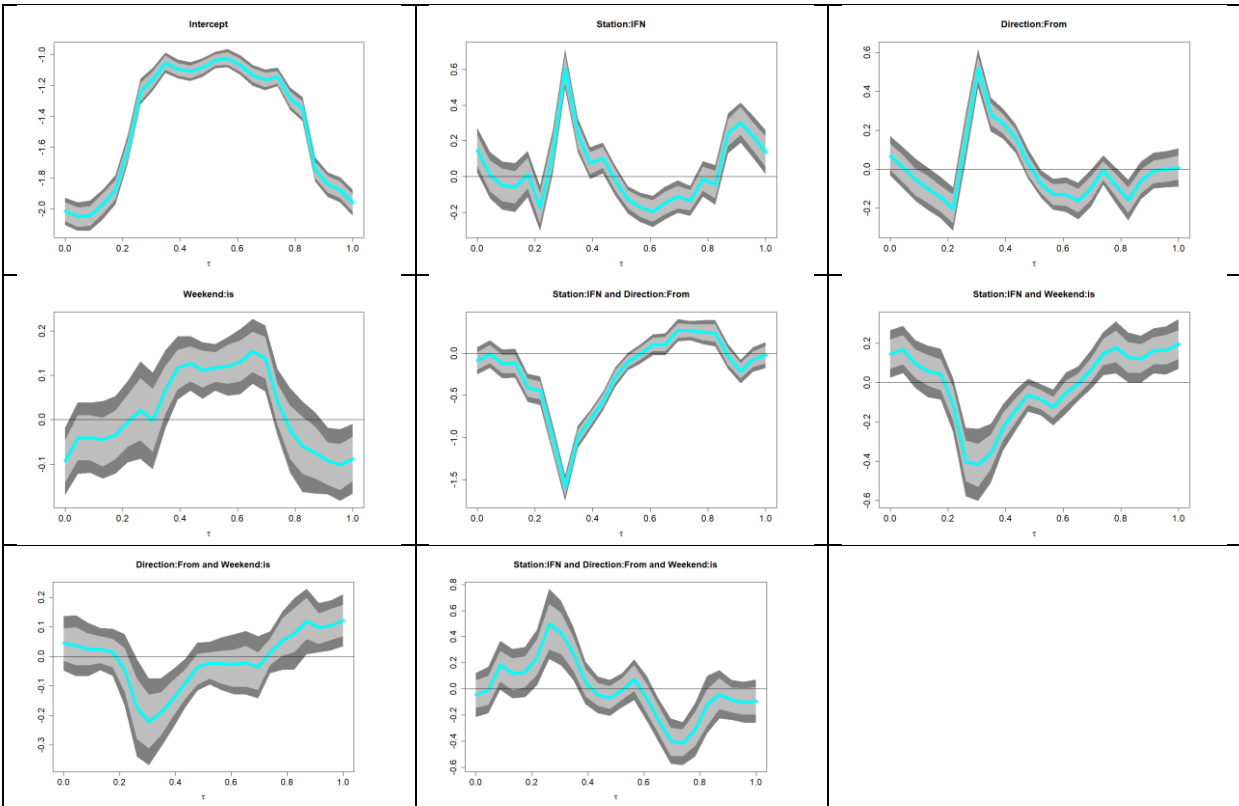

Figure 1. Estimated regression coefficient function, 95% pointwise credible intervals (light gray), and 95% simultaneous credible bands (dark gray). A horizontal line denotes zero change in the odds ratio.

### 1.1.3 The estimated regression coefficient table

The estimated coefficient of Bayesian Function on Scalar Regression is presented in the following table.

Table 1: The Estimated Coefficient of Bayesian, Mean (Standard Deviation)

|    | <b>Intercept</b> | <b>b1</b>       | <b>b2</b>       | <b>b3</b>       | <b>b4</b>       | <b>b5</b>       | <b>b6</b>       | <b>b7</b>       |
|----|------------------|-----------------|-----------------|-----------------|-----------------|-----------------|-----------------|-----------------|
| 1  | -7.3664 (0.107)  | 0.2006 (0.159)  | -0.0515 (0.105) | 0.0105 (0.05)   | -1.0291 (0.177) | 0.0415 (0.089)  | -0.002 (0.041)  | 0.0376 (0.109)  |
| 2  | 0.28 (0.03)      | 0.2546 (0.054)  | 0.5096 (0.044)  | 0.2277 (0.059)  | -2.035 (0.072)  | -0.8866 (0.097) | -0.4481 (0.085) | 0.696 (0.134)   |
| 3  | -0.0626 (0.033)  | -0.0216 (0.036) | -0.0299 (0.036) | 0.1408 (0.052)  | 0.4291 (0.064)  | 0.0104 (0.041)  | 0.005 (0.03)    | -0.5581 (0.104) |
| 4  | 0.0883 (0.036)   | -0.4047 (0.044) | -0.1178 (0.058) | 0.3132 (0.052)  | 0.4921 (0.071)  | -0.0084 (0.046) | -0.0566 (0.09)  | -0.4205 (0.123) |
| 5  | -0.3533 (0.025)  | 0.7489 (0.033)  | 0.5144 (0.031)  | -0.1159 (0.038) | -0.8017 (0.044) | -0.0435 (0.051) | 0.0003 (0.023)  | 0.0847 (0.064)  |
| 6  | -0.1296 (0.018)  | 0.0548 (0.025)  | 0.265 (0.026)   | -0.0005 (0.019) | -0.0061 (0.03)  | 0.0011 (0.022)  | -0.0965 (0.053) | -0.0515 (0.058) |
| 7  | -0.0282 (0.017)  | 0.0507 (0.026)  | 0.131 (0.024)   | -0.0033 (0.015) | -0.199 (0.036)  | -0.0207 (0.03)  | -0.0007 (0.015) | 0.0488 (0.046)  |
| 8  | -0.0396 (0.016)  | 0.0516 (0.024)  | 0.06 (0.021)    | -0.0262 (0.026) | -0.0052 (0.027) | 0.157 (0.049)   | -0.0021 (0.018) | -0.3596 (0.056) |
| 9  | -0.0107 (0.015)  | 0.0159 (0.021)  | 0.0575 (0.022)  | -0.0197 (0.021) | -0.0485 (0.034) | 0.0155 (0.029)  | 0.0009 (0.017)  | -0.0449 (0.046) |
| 10 | -0.0287 (0.014)  | 0.0888 (0.021)  | -0.0203 (0.018) | -0.0012 (0.013) | -0.0025 (0.025) | -0.0147 (0.024) | -0.0048 (0.016) | -0.0366 (0.038) |
| 11 | -0.009 (0.014)   | 0.0936 (0.02)   | -0.0326 (0.02)  | -0.0101 (0.015) | -0.0933 (0.032) | -0.0018 (0.018) | -0.001 (0.015)  | 0.0556 (0.042)  |
| 12 | -0.0068 (0.01)   | 0.0002 (0.013)  | 0.0206 (0.017)  | -0.0119 (0.016) | -0.0236 (0.025) | -0.0103 (0.022) | 0.0063 (0.018)  | 0.085 (0.044)   |
| 13 | -0.0163 (0.011)  | 0.0958 (0.016)  | -0.0171 (0.016) | 0.0267 (0.017)  | -0.1197 (0.025) | 0.0044 (0.017)  | 0.0086 (0.017)  | 0.0166 (0.027)  |
| 14 | -0.021 (0.012)   | 0.0366 (0.018)  | 0.0049 (0.012)  | -0.0034 (0.013) | -0.0029 (0.019) | 0.0167 (0.024)  | -0.0054 (0.015) | -0.0385 (0.036) |
| 15 | -0.007 (0.01)    | 0.0017 (0.011)  | -0.0241 (0.015) | 0.0108 (0.015)  | 0.0037 (0.016)  | 0.0147 (0.022)  | -0.0055 (0.015) | 0.0125 (0.027)  |
| 16 | -0.0118 (0.01)   | 0.0336 (0.017)  | 0.0127 (0.015)  | -0.0053 (0.012) | -0.0244 (0.023) | -0.0102 (0.018) | -0.0041 (0.014) | 0.001 (0.024)   |
| 17 | -0.0075 (0.01)   | -0.0121 (0.014) | 0.0453 (0.016)  | 0.0237 (0.019)  | -0.0195 (0.022) | -0.0038 (0.017) | 0.0145 (0.021)  | 0.0104 (0.026)  |
| 18 | 0.0194 (0.011)   | -0.0426 (0.016) | 0.0035 (0.012)  | -0.0277 (0.017) | 0.0368 (0.022)  | -0.0134 (0.023) | -0.0038 (0.013) | 0.0251 (0.03)   |
| 19 | -0.0372 (0.015)  | 0.0426 (0.02)   | 0.0495 (0.02)   | 0.0286 (0.018)  | -0.0534 (0.03)  | 0.0587 (0.03)   | -0.0021 (0.014) | -0.1591 (0.035) |
| 20 | -0.007 (0.009)   | -0.0053 (0.011) | 0.012 (0.011)   | 0.0243 (0.015)  | -0.0048 (0.015) | -0.0131 (0.019) | 0.0001 (0.013)  | -0.0348 (0.028) |
| 21 | -0.0002 (0.008)  | 0.0108 (0.012)  | 0.0182 (0.013)  | 0.0022 (0.01)   | -0.0929 (0.021) | -0.0071 (0.014) | 0.0123 (0.016)  | 0.0113 (0.022)  |
| 22 | 0.03 (0.01)      | -0.0161 (0.014) | -0.053 (0.013)  | -0.0055 (0.011) | 0.0122 (0.017)  | -0.0605 (0.024) | 0.0027 (0.012)  | 0.1214 (0.031)  |
| 23 | -0.0046 (0.01)   | 0.041 (0.013)   | -0.0263 (0.013) | 0.0029 (0.009)  | 0.0359 (0.022)  | -0.0031 (0.012) | 0.0007 (0.01)   | -0.0018 (0.019) |

\*\* b1= Station: IFN, b2= Direction: From, b3= Weekend: is, b4= Station: IFN and Direction: From, b5= Station: IFN and Weekend: is, b6= Direction: From and Weekend: is, b7= Station: IFN and Direction: From and Weekend:is

## 2 The Behavioral Factor

### 2.1 The average speed in airports

#### 2.1.1 - The B-Spline with Smoothing Parameter

We estimate the average speed function by B-Spline using smoothing parameter by GCV for IKA and IFN airport and in both directions. In the IKA airport, the two curves to the airport and from the airport are almost the same in most hours, but in the from the airport has one peak at 9:00. In the other hand, in IFN airport the average speed to the airport is higher in all hours than from the airport, and it has also one peak at 8:00.

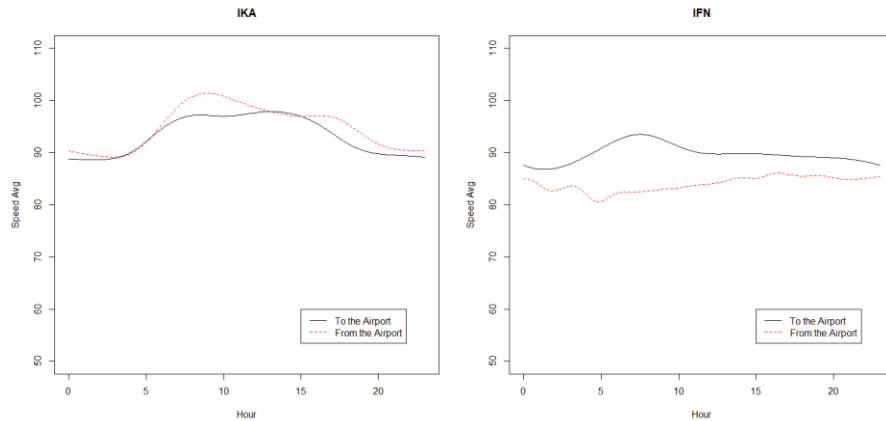

Figure 2: The functional average speed with using B-Spline in both airports and both directions.

## 2.2 The Bayesian Function on Regression

### 2.2.1 The estimated regression coefficient plot

The Bayesian FOSR is used to estimate the effects of total vehicle types from 1 to 5 on the average speed function.

The intercept shows that the average speed from 10:00 to 20:00 is the highest. The type 1 vehicle from 20:00 to 21:00 has statistically negative effect. In the type 2 vehicle from 19:00 to 20:00 has statistically positive effect. In the type 3 at 6:00 and 20:00 has statistically positive effect. In type 4, at 20:00 has statistically negative effect and in type 5 has at 6:00 and 20:00 statistically negative effect. (Figure 1\_6)

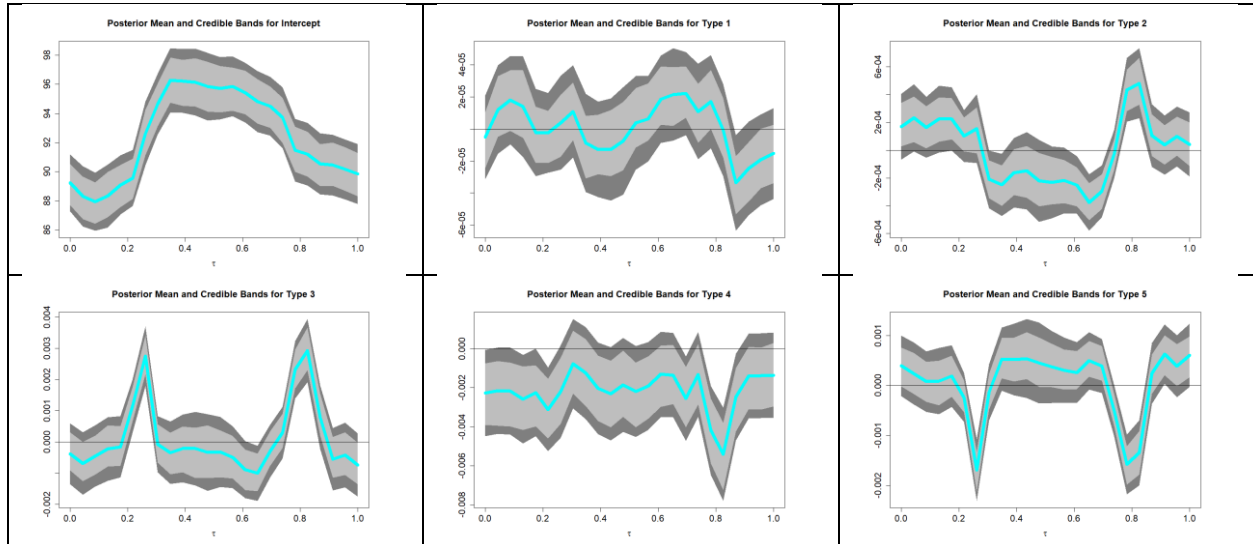

Figure 3: The Posterior Mean and Credible Bands for estimated effects of Vehicle Types from 1 to 5.

3 Type of Driving Offences

3.1 Speeding

3.1.1 The Descriptive Statistics

The proportion of traffic offences type 1: Speeding

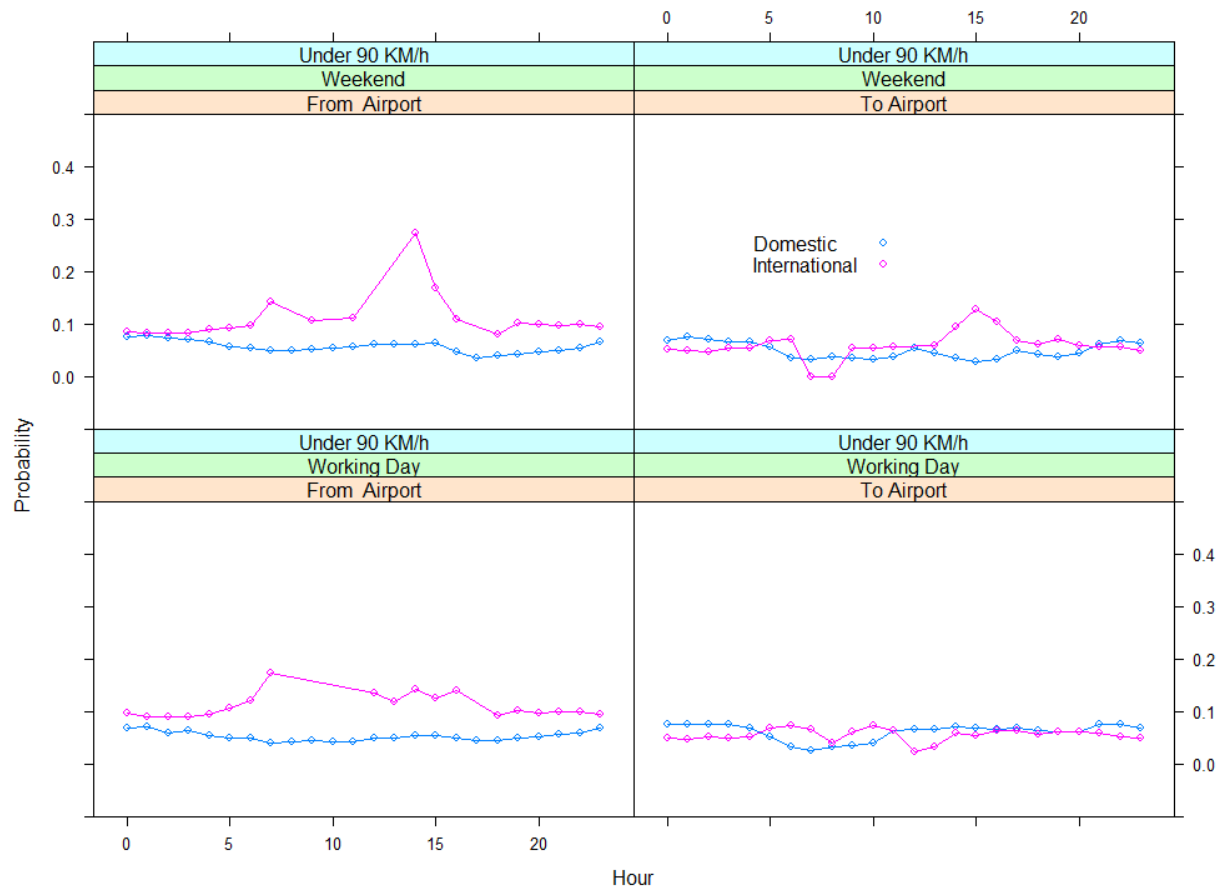

Figure 4: The proportion of traffic offences type 1, Speeding. For under 90 KM/h average speed, working day and direction.



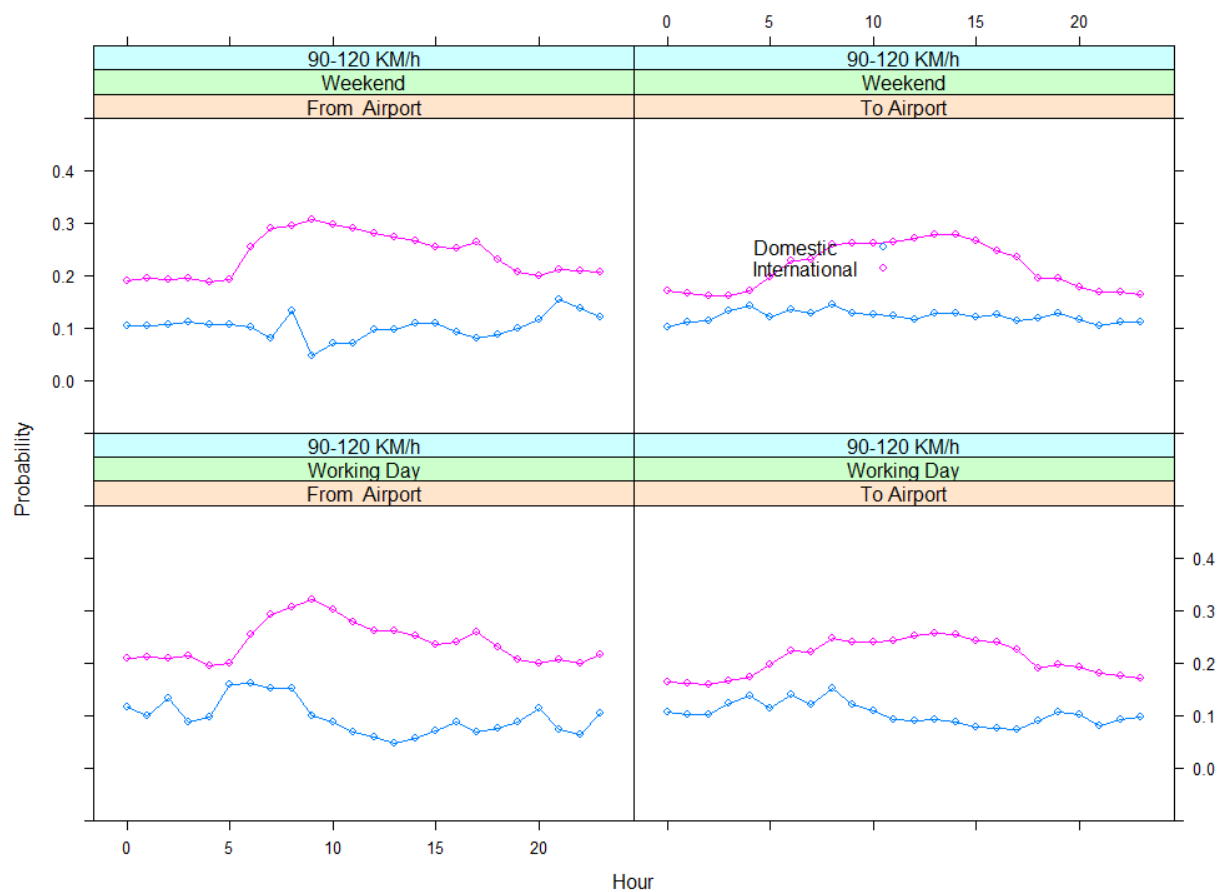

Figure 5: The proportion of traffic offences type 1, Speeding. For 90-120 KM/h average speed, working day and direction.

### 3.1.2 The estimated effects

#### The GAM (Generalized Additive Model) Result

#### Type 1 Driving Offences:

Table 2: The ANOVA table of the Parametric Coefficients for type 1 Driving Offences

| Terms             | Base                                        | Estimate | Std. Error | t-value | Pr(> t ) |
|-------------------|---------------------------------------------|----------|------------|---------|----------|
| Intercept         |                                             | 0.10     | 0.0025     | 40.5    | < 2e-16  |
| Days              | Working Day                                 | 0.00     | 0.0017     | -2.4    | 0.01511  |
| Direct            | To Airport                                  | 0.01     | 0.0033     | 4.0     | 8.30E-05 |
| Type              | International                               | 0.14     | 0.0033     | 41.6    | < 2e-16  |
| Speed             | Under 90 KM/H                               | -0.04    | 0.0033     | -13.4   | < 2e-16  |
| Direct:Type       | To Airport: International                   | -0.04    | 0.0047     | -8.6    | 3.29E-16 |
| Direct:Speed      | To Airport: Under 90 KM/H                   | -0.01    | 0.0047     | -2.7    | 0.00778  |
| Direct:Type:Speed | From Airport : International: Under 90 KM/H | -0.08    | 0.0050     | -16.1   | < 2e-16  |
| Direct:Type:Speed | To Airport : International: Under 90 KM/H   | -0.10    | 0.0047     | -20.3   | < 2e-16  |

Family: Gaussian, AIC: -1949.267 , BIC: -1733.174 , R-sq.(adj): 0.95, Deviance Explained: 95.6%, n= 373

| Smooth terms by Hour                     | edf   | Ref.df | F      | p-value  |
|------------------------------------------|-------|--------|--------|----------|
| Domestic:From Airport:90-120 KM/h        | 5.445 | 13     | 3.569  | 3.64E-09 |
| International:From Airport:90-120 KM/h   | 7.937 | 13     | 19.495 | < 2e-16  |
| Domestic:To Airport:90-120 KM/h          | 3.216 | 13     | 1.449  | 0.000158 |
| International:To Airport:90-120 KM/h     | 5.552 | 13     | 19.694 | < 2e-16  |
| Domestic:From Airport:Under 90 KM/h      | 1.762 | 13     | 0.487  | 0.022009 |
| International:From Airport:Under 90 KM/h | 8.257 | 13     | 7.587  | < 2e-16  |
| Domestic:To Airport:Under 90 KM/h        | 3.16  | 13     | 1.624  | 4.63E-05 |
| International:To Airport:Under 90 KM/h   | 1.354 | 13     | 0.339  | 0.037615 |

Number of basis= 14, cubic regression spline, Estimation method= REML (edf: Effective Degrees of Freedom)

# Driving Offences: Speeding

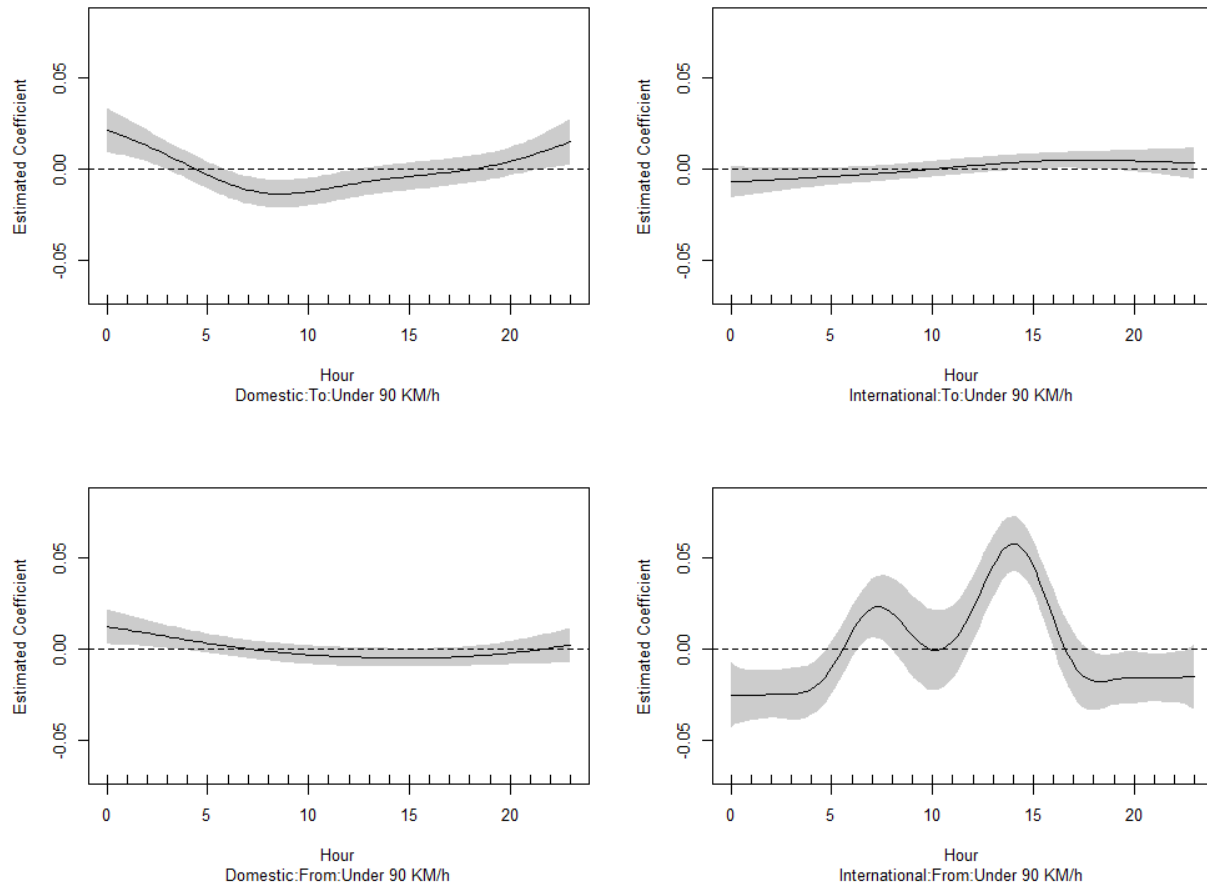

Figure 6: The estimated coefficients of Speeding driving offences for Under 90 KM/upper left: The domestic airport and “To” direction is slightly zero in all hours, Upper right: The international airport and “To” direction is slightly zero in all hours, bottom left: The domestic airport and “From” direction is slightly zero in all hours, bottom right: The International airport and “From” direction has positive effect between 13 to 15.

# Driving Offences: Speeding

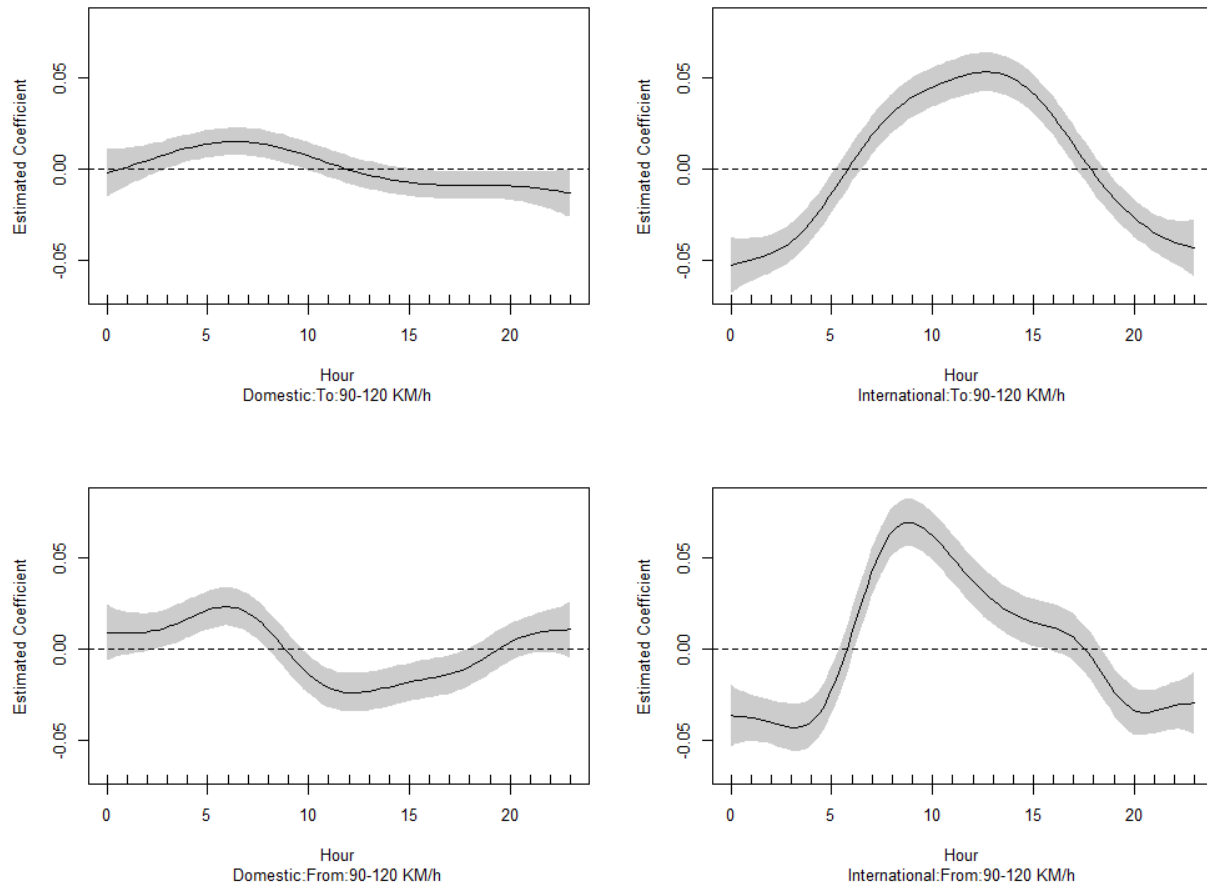

Figure 7: – The estimated coefficients of Speeding driving offences for 90-120 KM/upper left: The domestic airport and “To” direction has positive effects in early morning (4-8), Upper right: The international airport and “To” direction has positive effect in working hours (7-18), bottom left: The domestic airport and “From” direction has positive effect in early morning (4-8), bottom right: The International airport and “From” direction has positive effect in working hours (7-15).

3.2 Unsafe Distance

3.2.1 The Descriptive Statistics

The proportion of traffic offences type 2: Unsafe Distance

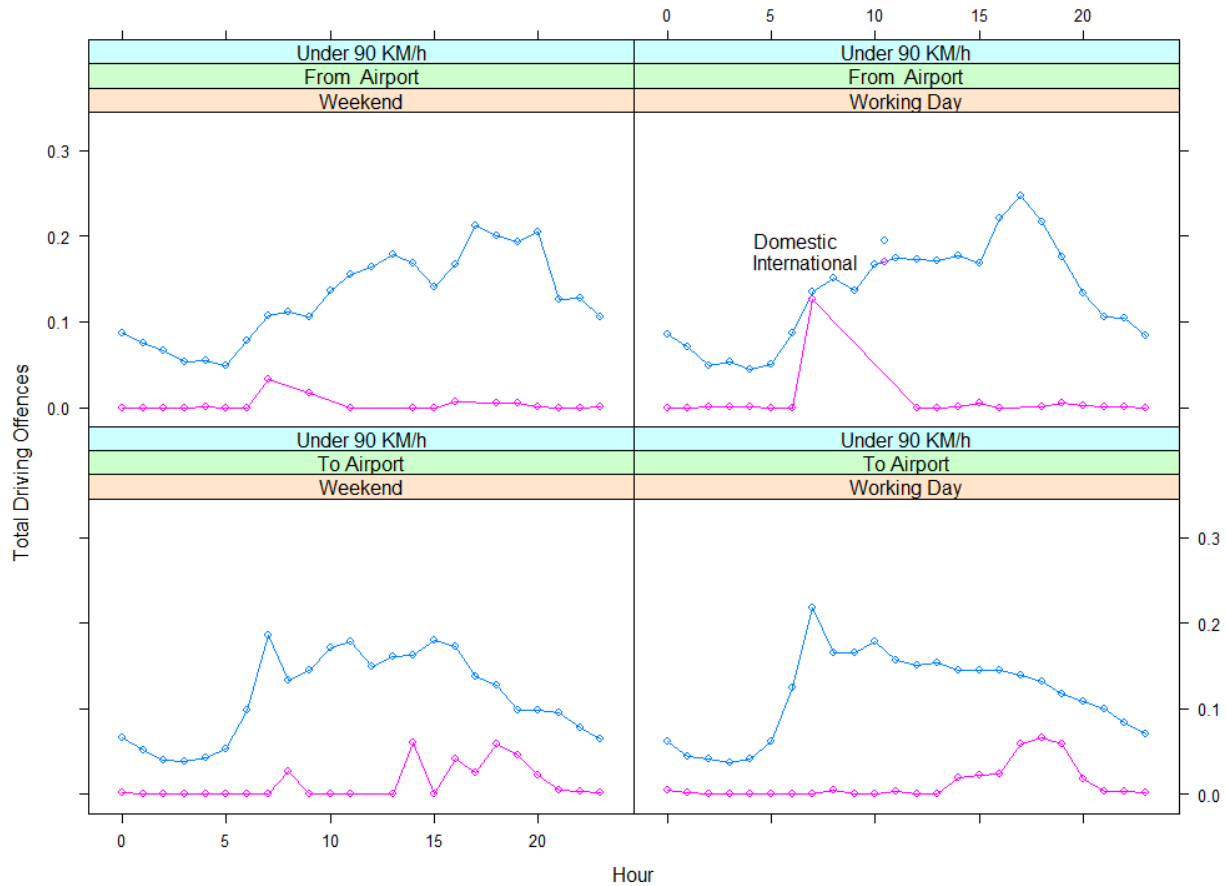

Figure 8: The proportion of traffic offences type 2, Unsafe Distance. For under 90 KM/h average speed, working day and direction.

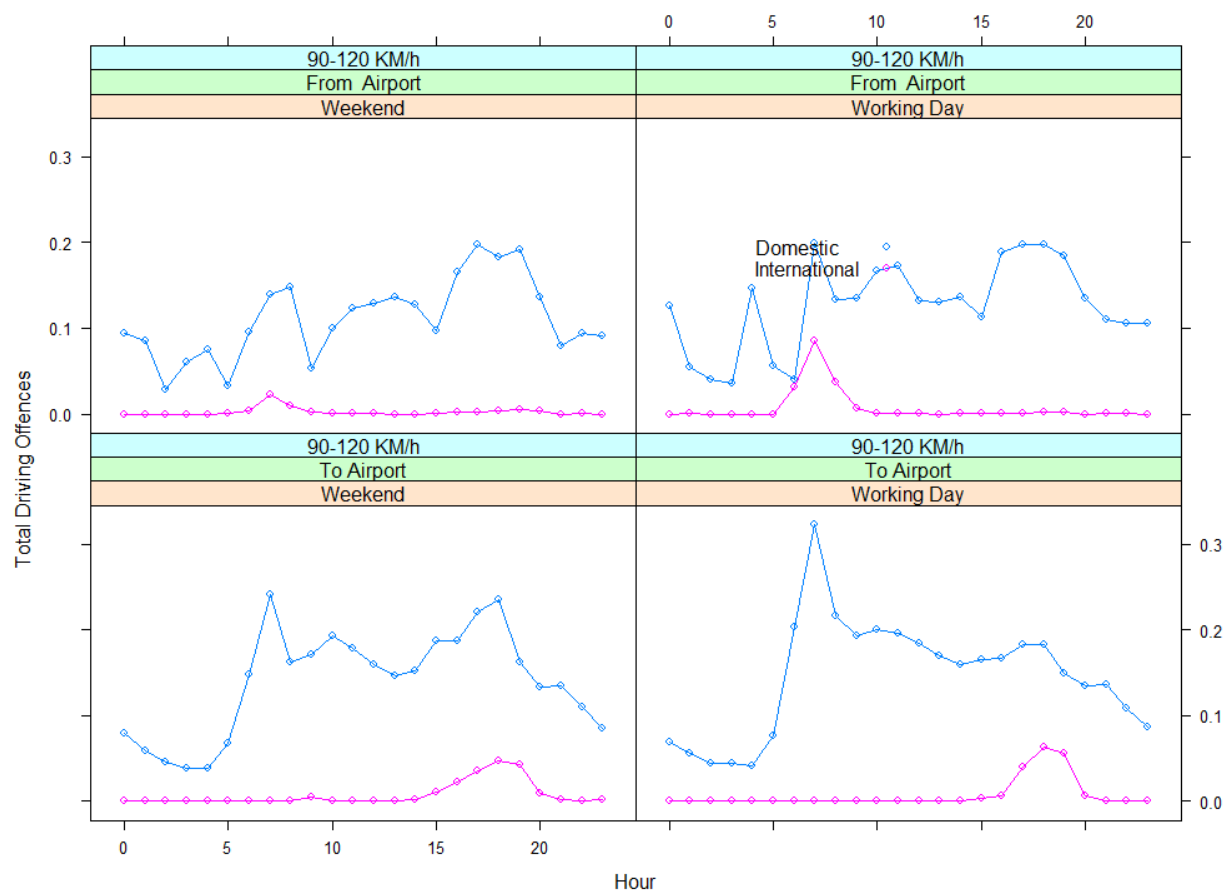

Figure 9: The proportion of traffic offences type 2, Unsafe Distance. For 90-120 KM/h average speed, working day and direction.

### 3.2.2 The estimated effects

#### Type 2 Driving Offences:

Table 3: The ANOVA table of the Parametric Coefficients for type 2 Driving Offences

| Terms             | Base                                        | Estimate | Std. Error | t-value | Pr(> t ) |
|-------------------|---------------------------------------------|----------|------------|---------|----------|
| Intercept         |                                             | 0.116    | 0.0028     | 41.002  | < 2e-16  |
| Days              | Working Day                                 | 0.005    | 0.0019     | 2.459   | 0.014475 |
| Direct            | To Airport                                  | 0.023    | 0.0038     | 5.978   | 6.11E-09 |
| Type              | International                               | -0.114   | 0.0038     | -30.207 | < 2e-16  |
| Speed             | Under 90 KM/H                               | 0.011    | 0.0038     | 2.930   | 0.003635 |
| Direct:Type       | To Airport: International                   | -0.020   | 0.0053     | -3.689  | 0.000265 |
| Direct:Speed      | To Airport: Under 90 KM/H                   | -0.038   | 0.0053     | -7.192  | 4.66E-12 |
| Direct:Type:Speed | From Airport : International: Under 90 KM/H | -0.010   | 0.0055     | -1.841  | 0.066522 |
| Direct:Type:Speed | To Airport : International: Under 90 KM/H   | 0.032    | 0.0053     | 6.006   | 5.23E-09 |

Family: Gaussian, AIC: -1850.26, BIC: -1589.968, R-sq.(adj): 0.936, Deviance Explained: 94.5%, n= 373

| Smooth terms by Hour                     | edf   | Ref.df | F      | p-value  |
|------------------------------------------|-------|--------|--------|----------|
| Domestic:From Airport:90-120 KM/h        | 10.73 | 13     | 17.887 | < 2e-16  |
| International:From Airport:90-120 KM/h   | 0.07  | 13     | 0.006  | 0.31497  |
| Domestic:To Airport:90-120 KM/h          | 11.61 | 13     | 39.296 | < 2e-16  |
| International:To Airport:90-120 KM/h     | 4.43  | 13     | 1.501  | 0.000438 |
| Domestic:From Airport:Under 90 KM/h      | 8.07  | 13     | 28.246 | < 2e-16  |
| International:From Airport:Under 90 KM/h | 0.10  | 13     | 0.008  | 0.310932 |
| Domestic:To Airport:Under 90 KM/h        | 8.52  | 13     | 23.759 | < 2e-16  |
| International:To Airport:Under 90 KM/h   | 4.58  | 13     | 2.357  | 2.27E-06 |

Number of basis= 14, cubic regression spline, Estimation method= REML (edf: Effective Degrees of Freedom)

# Driving Offences: Safe Following Distance

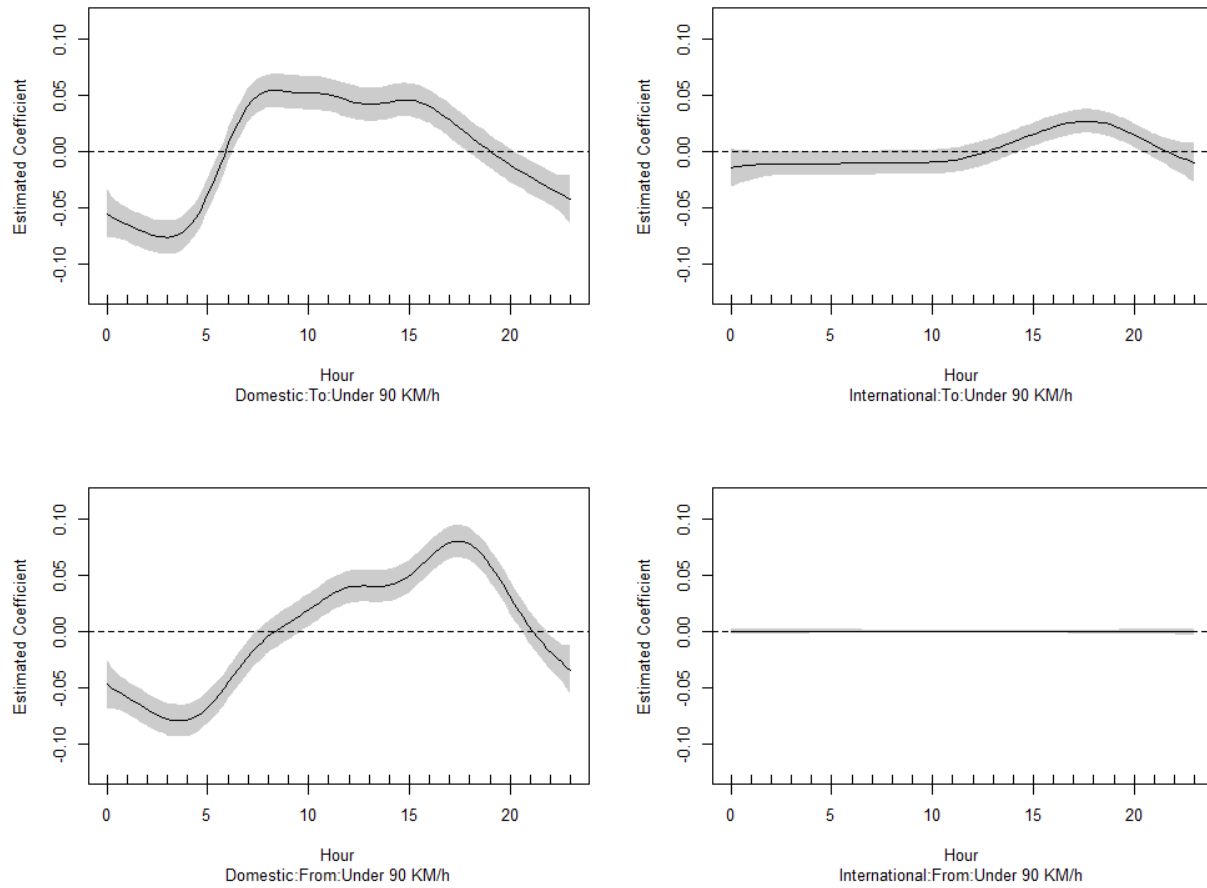

Figure 10: The estimated coefficients of Failing to follow a vehicle at a safe distance offences for Under 90 KM/upper left: The domestic airport and “To” direction has positive effect working hours, Upper right: The international airport and “To” direction has only positive effect 15 to 20, bottom left: The domestic airport and “From” direction has positive effect between 10 to 20, bottom right: The International airport and “From” direction has zero effect.



# Driving Offences: Safe Following Distance

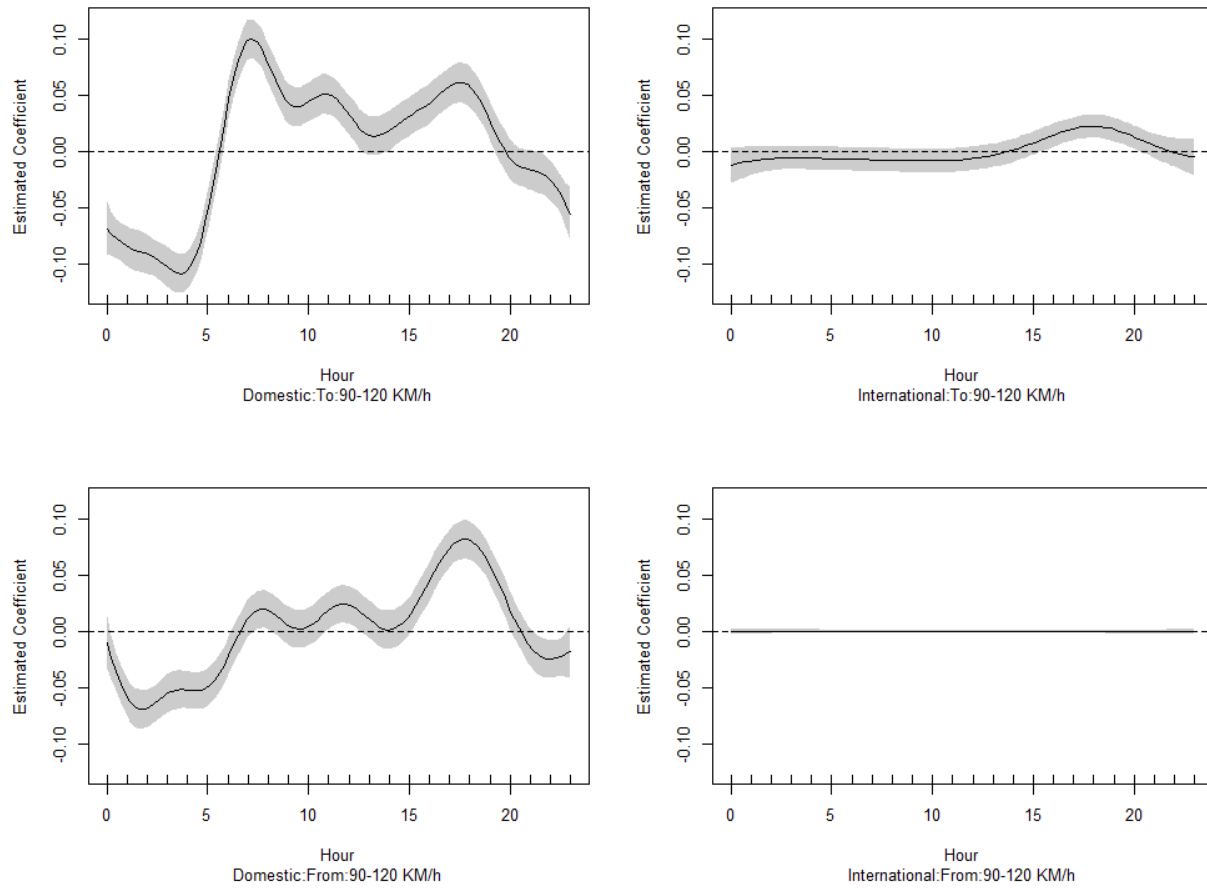

Figure 11: The estimated coefficients of Failing to follow a vehicle at a safe distance offences for 90-120 KM/h. Upper left: The domestic airport and “To” direction has positive effect working hours, Upper right: The international airport and “To” direction has only positive effect 15 to 20, bottom left: The domestic airport and “From” direction has positive effect between 10 to 20, bottom right: The International airport and “From” direction has zero effect.

4 Comparisons between other countries airports

4.1 The plot

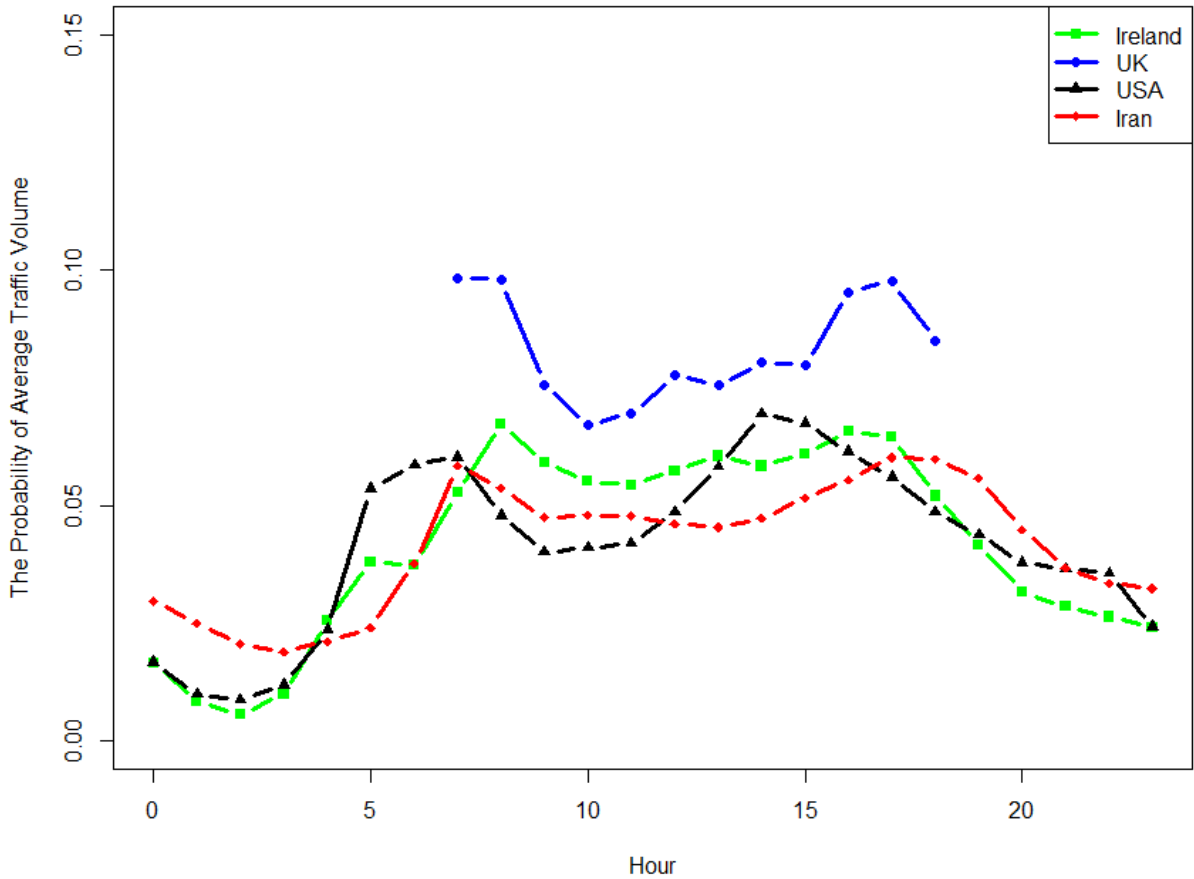

Figure 12: The Probability of Average Traffic Volume in different Airport Countries.

## 4.2 The Data resources

### 4.2.1 USA

There are one airport:

Table 4- The list of traffic count sites near the Hartsfield–Jackson Atlanta International Airport in the US

| Row | Airport name                                                  | Traffic Count Name                                                                                       | Description                                                          | Time-Interval |
|-----|---------------------------------------------------------------|----------------------------------------------------------------------------------------------------------|----------------------------------------------------------------------|---------------|
| 1   | Hartsfield–<br>Jackson<br>Atlanta<br>International<br>Airport | 0000063_1407 - 063-1407<br>0000063_R160 - 063-r160<br>0000063_R651 - 063-r651<br>0000063_8264 - 063-8264 | SR 000300 BEG AT<br>RPY 403225 L<br>SR 040300 BEG AT<br>Airport Blvd | 2018          |

We use only Hartsfield–Jackson Atlanta International Airport dataset because they are available online.

### Data Profile

The Georgia Department of Transportation's Traffic Analysis and Data Application (TADA!)

### Description

The Georgia Department of Transportation's Traffic Analysis and Data Application (TADA!) website presents data collected from the Georgia Traffic Monitoring Program located on the public roads in Georgia. The Website uses a dynamic mapping interface to allow the User to access data from the map as well as in a variety of report, graph, and data export formats. **Website**

<https://gdottrafficdata.drakewell.com/publicmultinodemap.asp>

308 4.2.2 UK

309 There are two airports:

310 Table 5- The list of traffic count sites near the Heathrow Airport and Gatwick Airport in the UK

| Row | Airport name     | Count Point IDs                                                                                                                              | Time-Interval |
|-----|------------------|----------------------------------------------------------------------------------------------------------------------------------------------|---------------|
| 1   | Heathrow Airport | Left (38599,47625,75148,78401)<br>Up (26118,56114,942674,16112,3612136013)<br>Right (58197,6123,73633,36309)<br>Bottom (953083,942678,73734) | 2018          |
| 2   | Gatwick Airport  | 46035,18231,57660,36274,90299,946199                                                                                                         | 2018          |

311 The data is not available for all hours. The average of all count point were used.

312

313 **Data Profile**

314 Road traffic statistics

315 **Data Description**

316 Summary and street-level traffic data for road-links on the motorway, 'A' road and minor road network in  
317 Great Britain. Use this website to find information about the road traffic statistics collected over the last  
318 18 years, across 34,416 manual count points. The latest information available covers 2018.

319 **Website**

320 <https://roadtraffic.dft.gov.uk/>

321

322

323

324

325

326

327

328

329

330

331

332

#### 4.2.3 Ireland

There are two airports:

Table 6- The list of traffic count sites near Dublin, Cork and Shanon airport in Ireland

| Row | Airport name | Traffic Count Name | Name            | Description                                                           | Time-Interval            |
|-----|--------------|--------------------|-----------------|-----------------------------------------------------------------------|--------------------------|
| 1   | Dublin       | NRA 000000001011   | TMU N01 000.0 N | M01 Airport Link Road Between R132 Swords Road and Jn2 Dublin Airport | 2018-10-23 to 2019-10-22 |
| 2   | Cork         | NRA 000000001271   | TMU N27 000.0 N | N27 Between Cork Airport and Cork, Ballycurreen, Co. Cork             | 2018-10-23 to 2019-10-22 |
| 3   | Shanon       | NRA 000000001191   | TMU N19 001.5 S | N19 Between R472 and Drumgeely roundabout, Ballymurtagh Co Clare.     | 2018-10-23 to 2019-10-22 |

We use only Dublin and Cork dataset because they are complete for that period.

#### Data Profile

TII Traffic Data Site

#### Data Description

The TII Traffic Data website presents data collected from the TII traffic counters located on the National Road Network. The Website uses a dynamic mapping interface to allow the User to access data in a variety of report formats.

#### Website

[https://www.nratrafficdata.ie/c2/gmapbasic.asp?sgid=ZvyVmXU8jBt9PJE\\$c7UXt6](https://www.nratrafficdata.ie/c2/gmapbasic.asp?sgid=ZvyVmXU8jBt9PJE$c7UXt6)
